# Supplementary material for: Comparison of Four Purification Methods on Serum Extracellular Vesicle Recovery, Size Distribution, and Proteomics
Source: MDPI journal article supplement (doi:10.3390/proteomes11030023), 2023-07-25
Supplement: s1 [file s1]

## Supplementary material

|        |                              | EX                                          | KI                                          | UC                                          | UF                                          |
|--------|------------------------------|---------------------------------------------|---------------------------------------------|---------------------------------------------|---------------------------------------------|
| NP 100 | Mode (nm)                    | 87 ± 0.8                                    | 70 ± 1.2                                    | 68 ± 0.9                                    | 86 ± 0.5                                    |
|        | Concentration (particles/ml) | 3.4x10 <sup>12</sup> ± 1.6x10 <sup>11</sup> | 6.4x10 <sup>12</sup> ± 1.2x10 <sup>11</sup> | 3.2x10 <sup>11</sup> ± 2.1x10 <sup>10</sup> | 1.7x10 <sup>13</sup> ± 4.7x10 <sup>11</sup> |
| NP 150 | Mode (nm)                    | 128 ± 1.6                                   | 143 ± 1.2                                   | 113 ± 1.2                                   | 175 ± 0.8                                   |
|        | Concentration (particles/ml) | 2.0x10 <sup>12</sup> ± 1.2x10 <sup>11</sup> | 9.5x10 <sup>11</sup> ± 1.2x10 <sup>10</sup> | 3.0x10 <sup>11</sup> ± 2.1x10 <sup>10</sup> | 6.1x10 <sup>12</sup> ± 8.2x10 <sup>10</sup> |

**Table 1. The size distribution of the extracellular vesicles.** Particle concentration and mode values for modal diameter obtained for exosome preparations isolated from serum, using ExoQuick™ (Systems Biosciences), Total Isolation Kit (Life Technologies), Ultracentrifugation and Ultrafiltration.
